# Supplementary material for: Urinary equol levels are positively associated with urinary estradiol excretion in women
Source: PubMed Central journal article supplement (PMC8484452; doi:10.1038/s41598-021-98872-2), 2021-09-30
Supplement: 41598_2021_98872_MOESM1_ESM.pdf [file 41598_2021_98872_MOESM1_ESM.pdf]

## **Supplementary information**

### **Urinary equol levels are positively associated with urinary estradiol excretion in women.**

**Tomoko Fujitani <sup>1</sup>, Yukiko Fujii <sup>2</sup>, Zhaoqing Lyu <sup>1</sup>, Mariko Harada Sassa <sup>1</sup>, Kouji H. Harada <sup>1,\*</sup>**

<sup>1</sup>Department of Health and Environmental Sciences, Kyoto University Graduate School of Medicine, Kyoto, 606-8501 Japan

<sup>2</sup>Department of Pharmaceutical Sciences, Daiichi University of Pharmacy, Fukuoka 815–8511, Japan

\*Correspondence: kharada-hes@umin.ac.jp; Tel.: +81-75-753-4490 (K.H.H.)

This file includes:

Supplementary Table S1. Characteristics of the study subjects by subgroups and their urinary estrogen and isoflavone concentrations.

Supplementary Table S2. Analysis of covariance for the association between urinary estrogen and equol levels.

Supplementary Table S3. Analysis of covariance of association between urinary estradiol and urinary equol levels with different substitutions for values less than detection limits.

Supplementary Table S4. Analysis of covariance for association between equol producing status and urinary estrogens.

Supplementary Table S5. Analysis of covariance of the association between log urinary E2 and log equol, including log daidzein, age, and smoking (N = 501).

Supplementary Table S6. Analysis of covariance of the association between urinary equol and estradiol levels in women who had high-daidzein levels (>1000 µg/gCr, N=327).

Supplementary Table S7. Analysis of covariance of the association between urinary equol and estrogen levels in premenopausal and postmenopausal women.

Supplementary Table S8. Analysis of covariance of the association between urinary equol and estradiol levels stratified to luteal phase women and follicular phase women (N=115).

Supplementary Table S9. Analysis of covariance of the association between log urinary E2 and log equol, including log daidzein, age, smoking, BMI, and disease histories among

study subjects from Kyoto (N = 109).

Supplementary Table S10. Analysis of covariance of the association between urinary estradiol and equol levels in women without a history of disease (N=363).

Supplementary Fig. S1. Typical chromatogram of analysis of phytoestrogens and estrogens.

|                              | Urinary E2 ( $\mu\text{g/gCr}$ ) | Equol ( $\mu\text{g/gCr}$ ) | Urinary creatinine (g/L) |
|------------------------------|----------------------------------|-----------------------------|--------------------------|
| <b>Age</b>                   |                                  |                             |                          |
| 20-39                        | 2.48 (3.27)                      | 52.5 (5.93)                 | 1.14 (1.80)              |
| 40-59                        | 3.40 (3.84)                      | 94.1 (7.04)                 | 0.915 (1.78)             |
| 60-                          | 2.99 (3.54)                      | 81.1 (5.46)                 | 0.753 (1.73)             |
|                              | <i>P</i> =0.0704                 | <i>P</i> =0.0128            | <i>P</i> <0.0001         |
| <b>Menstrual cycle</b>       |                                  |                             |                          |
| Regular cycles               | 2.85 (3.39)                      | 60.6 (6.24)                 | 1.07 (1.80)              |
| Irregular cycles             | 3.40 (4.07)                      | 117 (7.26)                  | 0.906 (1.87)             |
| Menopause                    | 3.19 (3.84)                      | 99.4(6.46)                  | 0.793(1.70)              |
| Experienced                  | 3.28 (3.95)                      | 80.7 (6.12)                 | 0.812 (1.95)             |
| <b>gynecological surgery</b> |                                  |                             |                          |
|                              | <i>P</i> =0.717                  | <i>P</i> =0.0225            | <i>P</i> <0.0001         |
| <b>Smoking habit</b>         |                                  |                             |                          |
| Non-smoker                   | 3.21 (3.59)                      | 86.0 (6.44)                 | 0.914 (1.77)             |
| Current smoker               | 1.82 (3.13)                      | 37.4 (5.19)                 | 1.12 (1.79)              |
| Ex-smoker                    | 5.23 (5.47)                      | 88.9 (9.15)                 | 0.830 (2.42)             |
|                              | <i>P</i> =0.00179                | <i>P</i> =0.00577           | <i>P</i> =0.0309         |
| <b>Disease history</b>       |                                  |                             |                          |
| None                         | 3.08 (3.63)                      | 80.6 (6.61)                 | 0.951 (1.79)             |
| Current/past histories       | 2.95 (3.67)                      | 73.0 (6.07)                 | 0.855 (1.83)             |
|                              | <i>P</i> = 0.725                 | <i>P</i> = 0.589            | <i>P</i> = 0.0685        |

**Supplementary Table S1.** Geometric means of urinary estradiol, equol and creatinine concentrations of the study subjects by subgroups. Value of E2, Equol, and creatinine was geometric mean and geometric standard deviations. gCr: grams creatinine. † *P* values indicates the results from analysis of variance for log-transformed concentrations of urinary equol, E2, creatinine.

| Dependent variables                      | N   | Log Equol ( $\mu\text{g/gCr}$ )<br>as independent variable |                |                | Model<br>fitness |
|------------------------------------------|-----|------------------------------------------------------------|----------------|----------------|------------------|
|                                          |     | $\beta$                                                    | 95% CI         | <i>P</i> value | $R^2$            |
| Log urinary E1 ( $\mu\text{g/gCr}$ )     | 365 | 0.0697                                                     | 0.0670–0.132   | 0.0277         | 0.185            |
| Log urinary E3 ( $\mu\text{g/gCr}$ )     | 365 | 0.0590                                                     | –0.00489–0.123 | 0.0702         | 0.275            |
| Log urinary 4-OHE1 ( $\mu\text{g/gCr}$ ) | 66  | 0.197                                                      | 0.0309–0.363   | 0.0209         | 0.0972           |
| Log urinary 4-OHE2 ( $\mu\text{g/gCr}$ ) | 66  | 0.441                                                      | 0.332–0.551    | <0.0001        | 0.523            |

**Supplementary Table S2.** Analysis of covariance for the association between urinary estrogen and equol levels. CI: confidence interval. Analysis of covariance was conducted for each log urinary estrogen as dependent variable with independent variables (log equol, age and smoking). Age and smoking were included as covariables. Tobacco use was coded as 1 = non-smoker, 2 = current smoker, and 3 = ex-smoker.

| Dependent variables                      | N   | Independent variable:<br>Log urinary Equol ( $\mu\text{g/gCr}$ ) |               |                | Model fitness |
|------------------------------------------|-----|------------------------------------------------------------------|---------------|----------------|---------------|
|                                          |     | $\beta$                                                          | 95% CI        | <i>P</i> value | $R^2$         |
| BLOQ assumed as 0                        |     |                                                                  |               |                |               |
| Log urinary E1 ( $\mu\text{g/gCr}$ )     | 105 | -0.0397                                                          | -0.164–0.0849 | 0.529          | 0.00747       |
| Log urinary E2 ( $\mu\text{g/gCr}$ )     | 177 | 0.575                                                            | 0.509–0.641   | <0.0001        | 0.645         |
| Log urinary E3 ( $\mu\text{g/gCr}$ )     | 99  | -0.0407                                                          | -0.172–0.0906 | 0.540          | 0.193         |
| Log urinary 4OH-E1 ( $\mu\text{g/gCr}$ ) | 12  | -0.165                                                           | -0.520–0.191  | 0.316          | 0.641         |
| Log urinary 4OH-E2 ( $\mu\text{g/gCr}$ ) | 12  | 0.494                                                            | -0.250–1.24   | 0.160          | 0.552         |
| BLOQ assumed as LOQ                      |     |                                                                  |               |                |               |
| Log urinary E1 ( $\mu\text{g/gCr}$ )     | 365 | 0.0825                                                           | 0.0208–0.144  | 0.00897        | 0.144         |
| Log urinary E2 ( $\mu\text{g/gCr}$ )     | 501 | 0.583                                                            | 0.555–0.611   | <0.0001        | 0.781         |
| Log urinary E3 ( $\mu\text{g/gCr}$ )     | 365 | 0.0662                                                           | 0.00261–0.130 | 0.0414         | 0.237         |
| Log urinary 4OH-E1 ( $\mu\text{g/gCr}$ ) | 66  | 0.207                                                            | 0.0517–0.361  | 0.00977        | 0.123         |
| Log urinary 4OH-E2 ( $\mu\text{g/gCr}$ ) | 66  | 0.438                                                            | 0.335–0.540   | <0.0001        | 0.555         |

**Supplementary Table S3.** Analysis of covariance for association between urinary estrogens and urinary equol levels with different substitutions for values less than detection limits. BLOQ: below limits of quantification. CI: confidence interval. Urinary equol levels less than LOQ were substituted to zero or LOQ values. Analysis of covariance was conducted for each log urinary estrogen as dependent variable with independent variables (log equol, age and smoking). Age and smoking were included as covariables in addition to EQP in all analyses. EQP status was coded as 1 = EQP and 0 = non-EQP; tobacco use was coded as 1 = non-smoker, 2 = current smoker, and 3 = ex-smoker.

| Dependent variables                      | N   | Independent variable: EQP |                |                | Model fitness  |
|------------------------------------------|-----|---------------------------|----------------|----------------|----------------|
|                                          |     | $\beta$                   | 95% CI         | <i>P</i> value | R <sup>2</sup> |
| Log urinary E1 ( $\mu\text{g/gCr}$ )     | 365 | 0.00798                   | -0.0428–0.0587 | 0.757          | 0.174          |
| Log urinary E3 ( $\mu\text{g/gCr}$ )     | 365 | -0.000170                 | -0.0524–0.0520 | 0.995          | 0.268          |
| Log urinary 4-OHE1 ( $\mu\text{g/gCr}$ ) | 66  | -0.0203                   | -0.173–0.133   | 0.791          | 0.0151         |
| Log urinary 4-OHE2 ( $\mu\text{g/gCr}$ ) | 66  | 0.233                     | 0.108–0.358    | 0.000435       | 0.197          |

**Supplementary Table S4.** Analysis of covariance for association between equol producing status and urinary estrogens. CI: confidence interval. Analysis of covariance was conducted for each log urinary estrogen as dependent variable with independent variables (log equol, age and smoking). Age and smoking were included as covariables in addition to EQP in all analyses. EQP status was coded as 1 = EQP and 0 = non-EQP; tobacco use was coded as 1 = non-smoker, 2 = current smoker, and 3 = ex-smoker.

| <b>Dependent variable: Log urinary E2 (µg/gCr)</b> |          |                   |                |
|----------------------------------------------------|----------|-------------------|----------------|
| <b>Independent variables</b>                       | $\beta$  | 95% CI            | <i>P</i> value |
| Age (yr)                                           | -0.00145 | -0.00397–0.00107  | 0.258          |
| Log Daidzein (µg/gCr)                              | -0.0121  | -0.0501–0.0260    | 0.533          |
| Log Equol (µg/gCr)                                 | 0.599    | 0.567–0.630       | <0.0001        |
| Smoking habit                                      |          |                   |                |
| (current smoker)                                   | -0.0896  | -0.159 to -0.0206 | 0.0110         |
| (ex-smoker)                                        | 0.142    | 0.0435–0.241      | 0.0048         |

**Supplementary Table S5.** Analysis of covariance of the association between log urinary E2 and log equol, including log daidzein, age, and smoking (N = 501). CI: confidence interval. Analysis of covariance was conducted for log urinary E2 as dependent variable with independent variables (log equol, log daidzein, age and smoking). Log daidzein, age, and smoking were included as covariables in addition to log equol in this analysis. Tobacco use was coded as 1 = non-smoker, 2 = current smoker, and 3 = ex-smoker. Model fitness:  $R^2 = 0.752$ .

| <b>Dependent variable: Log Urinary E2 (<math>\mu\text{g/gCr}</math>)</b> |          |                  |                |
|--------------------------------------------------------------------------|----------|------------------|----------------|
| <b>Independent Variables</b>                                             | $\beta$  | 95% CI           | <i>P</i> value |
| Age                                                                      | -0.00159 | -0.00451–0.00133 | 0.285          |
| Log Equol ( $\mu\text{g/gCr}$ )                                          | 0.613    | 0.578–0.648      | <0.0001        |
| Smoking habit<br>(current smoker)                                        | -0.0798  | -0.165–0.00575   | 0.0674         |
| (ex-smoker)                                                              | 0.150    | 0.0214–0.278     | 0.0223         |

**Supplementary Table S6.** Analysis of covariance of the association between urinary equol and estradiol levels in women who had high-daidzein levels ( $>1000 \mu\text{g/gCr}$ ,  $N=327$ ). CI: confidence interval. Analysis of covariance was conducted for log urinary E2 as dependent variable with independent variables (log equol, age and smoking). Age and smoking were included as covariables in addition to log equol. Tobacco use was coded as 1 = non-smoker, 2 = current smoker, and 3 = ex-smoker. Model fitness:  $R^2 = 0.797$ .



| <b>Dependent variable: Log urinary E2 (<math>\mu\text{g/gCr}</math>)</b>                   |          |                  |                |
|--------------------------------------------------------------------------------------------|----------|------------------|----------------|
| <b>Premenopausal (N=234, average age=40.42 <math>\pm</math> 5.81, median age=39)</b>       |          |                  |                |
| <b>Independent variables</b>                                                               | $\beta$  | 95% CI           | <i>P</i> value |
| Age (yr)                                                                                   | 0.00364  | -0.00304-0.0103  | 0.284          |
| Log Equol ( $\mu\text{g/gCr}$ )                                                            | 0.550    | 0.501-0.598      | <0.0001        |
| Smoking habit                                                                              |          |                  |                |
| (current smoker)                                                                           | -0.0633  | -0.155-0.0284    | 0.175          |
| (ex-smoker)                                                                                | 0.0651   | -0.0689-0.199    | 0.340          |
| <b>Postmenopausal (N =181, average age =57.91 <math>\pm</math> 4.66, median age=59)</b>    |          |                  |                |
| <b>Independent variables</b>                                                               | $\beta$  | 95% CI           | <i>P</i> value |
| Age (yr)                                                                                   | 0.00338  | -0.00487-0.0116  | 0.420          |
| Log Equol ( $\mu\text{g/gCr}$ )                                                            | 0.651    | 0.603-0.698      | <0.0001        |
| Smoking habit                                                                              |          |                  |                |
| (current smoker)                                                                           | -0.046   | -0.204-0.112     | 0.566          |
| (ex-smoker)                                                                                | 0.0802   | -0.168-0.328     | 0.524          |
| <b>Dependent variable: Log urinary E1 (<math>\mu\text{g/gCr}</math>)</b>                   |          |                  |                |
| <b>Premenopausal (N = 172, average age = 40.41 <math>\pm</math> 5.27, median age = 39)</b> |          |                  |                |
| <b>Independent variables</b>                                                               | $\beta$  | 95% CI           | <i>P</i> value |
| Age                                                                                        | -0.00994 | -0.0208-0.000872 | 0.0713         |
| Log Equol ( $\mu\text{g/gCr}$ )                                                            | 0.0361   | -0.0335-0.106    | 0.307          |
| Smoking habit                                                                              |          |                  |                |
| (ex-smoker)                                                                                | 0.112    | -0.0807-0.306    | 0.252          |
| (current smoker)                                                                           | -0.0644  | -0.196-0.0675    | 0.336          |
| <b>Postmenopausal (N =133, average age =58.09 <math>\pm</math> 4.9, median age = 59)</b>   |          |                  |                |
| <b>Independent variables</b>                                                               | $\beta$  | 95% CI           | <i>P</i> value |
| Age                                                                                        | 0.00602  | -0.0124-0.0244   | 0.519          |
| Log Equol ( $\mu\text{g/gCr}$ )                                                            | 0.0914   | -0.0267-0.210    | 0.128          |
| Smoking habit                                                                              |          |                  |                |
| (ex-smoker)                                                                                | -0.171   | -0.868-0.527     | 0.629          |
| (current smoker)                                                                           | 0.153    | -0.256-0.562     | 0.460          |
| <b>Dependent variable: Log urinary E3 (<math>\mu\text{g/gCr}</math>)</b>                   |          |                  |                |
| <b>Premenopausal (N = 172, average age = 40.41 <math>\pm</math> 5.27, median age = 39)</b> |          |                  |                |

| Independent variables                                                   | $\beta$  | 95% CI          | <i>P</i> value |
|-------------------------------------------------------------------------|----------|-----------------|----------------|
| Age                                                                     | -0.00544 | -0.0189–0.00799 | 0.425          |
| Log Equol ( $\mu\text{g/gCr}$ )                                         | 0.0445   | -0.0420–0.131   | 0.311          |
| Smoking habit                                                           |          |                 |                |
| (ex-smoker)                                                             | 0.142    | -0.0978–0.382   | 0.244          |
| (current smoker)                                                        | -0.0678  | -0.232–0.0960   | 0.415          |
| <hr/>                                                                   |          |                 |                |
| Postmenopausal (N =133, average age =58.09 $\pm$ 4.90, median age = 59) |          |                 |                |
| <hr/>                                                                   |          |                 |                |
| Independent variables                                                   | $\beta$  | 95% CI          | <i>P</i> value |
| Age                                                                     | -0.0135  | -0.0291–0.00212 | 0.0896         |
| Log Equol ( $\mu\text{g/gCr}$ )                                         | 0.0842   | -0.0159–0.184   | 0.0986         |
| Smoking habit                                                           |          |                 |                |
| (ex-smoker)                                                             | 0.688    | 0.096–1.279     | 0.023          |
| (current smoker)                                                        | -0.184   | -0.531–0.162    | 0.294          |

**Supplementary Table S7.** Analysis of covariance of the association between urinary equol and estrogen levels in premenopausal and postmenopausal women. CI: confidence interval.

Participants with irregular menstrual cycles or who had experienced gynecological surgery were excluded. Analysis of covariance was conducted for log urinary E2, E1 and E3 as dependent variables with independent variables (log equol, age and smoking). Tobacco use was coded as 1 = non-smoker, 2 = current smoker, and 3 = ex-smoker. In estradiol analysis, model fitness was  $R^2 = 0.704$  for premenopausal women;  $R^2 = 0.810$  for postmenopausal women. In estrone analysis,  $R^2 = 0.0337$  for premenopausal women;  $R^2 = 0.0242$  for postmenopausal women. In estriol analysis,  $R^2 = 0.0185$  for premenopausal women;  $R^2 = 0.119$  for postmenopausal women.

| <b>Dependent variable: Log urinary E2 (µg/gCr)</b>                        |          |                 |                |
|---------------------------------------------------------------------------|----------|-----------------|----------------|
| <b>Luteal phase (N=63, average age=41.90 ± 5.58, median age=42)</b>       |          |                 |                |
| <b>Independent variables</b>                                              | <b>β</b> | <b>95% CI</b>   | <b>P value</b> |
| Age (yr)                                                                  | -0.0128  | -0.0328–0.00716 | 0.204          |
| Log Equol (µg/gCr)                                                        | 0.271    | 0.145–0.397     | <0.0001        |
| Smoking habit                                                             |          |                 |                |
| (current smoker)                                                          | -0.00233 | -0.302–0.298    | 0.988          |
| (ex-smoker)                                                               | 0.0783   | -0.355–0.512    | 0.719          |
| <b>Follicular phase (N =52, average age =43.81 ± 5.68, median age=43)</b> |          |                 |                |
| <b>Independent variables</b>                                              | <b>β</b> | <b>95% CI</b>   | <b>P value</b> |
| Age (yr)                                                                  | 0.000174 | -0.0201–0.0205  | 0.986          |
| Log Equol (µg/gCr)                                                        | 0.246    | 0.144–0.347     | <0.0001        |
| Smoking habit                                                             |          |                 |                |
| (current smoker)                                                          | 0.0498   | -0.219–0.319    | 0.712          |
| (ex-smoker)                                                               | -0.117   | -0.434–0.201    | 0.463          |

**Supplementary Table S8.** Analysis of covariance of the association between urinary equol and estradiol levels stratified to luteal phase women and follicular phase women (N=115).

Pre-menopausal participants who had progesterone concentration over 1 ng/mL were classified to luteal phase group. CI: confidence interval. Participants with irregular menstrual cycles or who had experienced gynecological surgery were excluded. Analysis of covariance was conducted for log urinary E2 as dependent variable with independent variables (log equol, age and smoking). Age and smoking were included as covariables in addition to log equol. Tobacco use was coded as 1 = non-smoker, 2 = current smoker, and 3 = ex-smoker. Model fitness:  $R^2 = 0.261$  for luteal phase women;  $R^2 = 0.365$  for follicular phase women.

| <b>Dependent variable: Log urinary E2 (<math>\mu\text{g/gCr}</math>)</b> |          |                 |                |
|--------------------------------------------------------------------------|----------|-----------------|----------------|
| <b>Independent variables</b>                                             | $\beta$  | 95% CI          | <i>P</i> value |
| BMI                                                                      | -0.00116 | -0.0164–0.0140  | 0.880          |
| Age (yr)                                                                 | -0.00819 | -0.0216–0.00522 | 0.228          |
| Log Daidzein ( $\mu\text{g/gCr}$ )                                       | 0.00669  | -0.0752–0.0886  | 0.872          |
| Log Equol ( $\mu\text{g/gCr}$ )                                          | 0.631    | 0.567–0.695     | < 0.0001       |
| Smoking habit                                                            |          |                 |                |
| (current smoker)                                                         | -0.131   | -0.348–0.0864   | 0.235          |
| (ex-smoker)                                                              | 0.294    | -0.0726–0.661   | 0.115          |
| Menstrual status                                                         |          |                 |                |
| (irregular cycles)                                                       | -0.0510  | -0.237–0.135    | 0.588          |
| (menopause)                                                              | 0.0308   | -0.125–0.186    | 0.695          |
| (experienced gynecological surgeries)                                    | 0.0210   | -0.293–0.336    | 0.895          |
| Disease histories                                                        |          |                 |                |
| (without disease histories)                                              | -0.00820 | -0.0705–0.0541  | 0.794          |

**Supplementary Table S9.** Analysis of covariance of the association between log urinary E2 and log equol, including log daidzein, age, smoking, BMI and disease histories among study subjects from Kyoto (N = 109). CI: confidence interval. Analysis of covariance was conducted for log urinary E2 as dependent variable with independent variables (log equol, log daidzein, age and smoking). Log daidzein, age, and smoking were included as covariables in addition to log equol in this analysis. Tobacco use was coded as 1 = non-smoker, 2 = current smoker, and 3 = ex-smoker. Menstrual status was coded as 1 = regular cycles, 2 = irregular cycles, 3 = menopause, and 4 = experienced gynecological surgery. Disease history was coded as 1 = person with current or past disease histories, and 2 = person without disease histories. Category 1 was set as a referent. Model fitness:  $R^2 = 0.806$ .

| <b>Dependent variable: Log urinary E2 (µg/gCr)</b> |          |                   |                |
|----------------------------------------------------|----------|-------------------|----------------|
| <b>Independent variables</b>                       | $\beta$  | 95% CI            | <i>P</i> value |
| Age (yr)                                           | -0.00237 | -0.00560–0.000867 | 0.1510         |
| Log Equol (µg/gCr)                                 | 0.588    | 0.551–0.625       | <0.0001        |
| Smoking habit<br>(current smoker)                  | -0.0562  | -0.139–0.0262     | 0.181          |
| (ex-smoker)                                        | 0.0831   | -0.0378–0.204     | 0.177          |

**Supplementary Table S10.** Analysis of covariance of the association between urinary estradiol and equol levels in women without a history of disease (N=363). CI: confidence interval. Analysis of covariance was conducted for log urinary E2 as dependent variable with independent variables (log equol, age and smoking). Tobacco use was coded as 1 = non-smoker, 2 = current smoker, and 3 = ex-smoker.  $R^2 = 0.734$ .

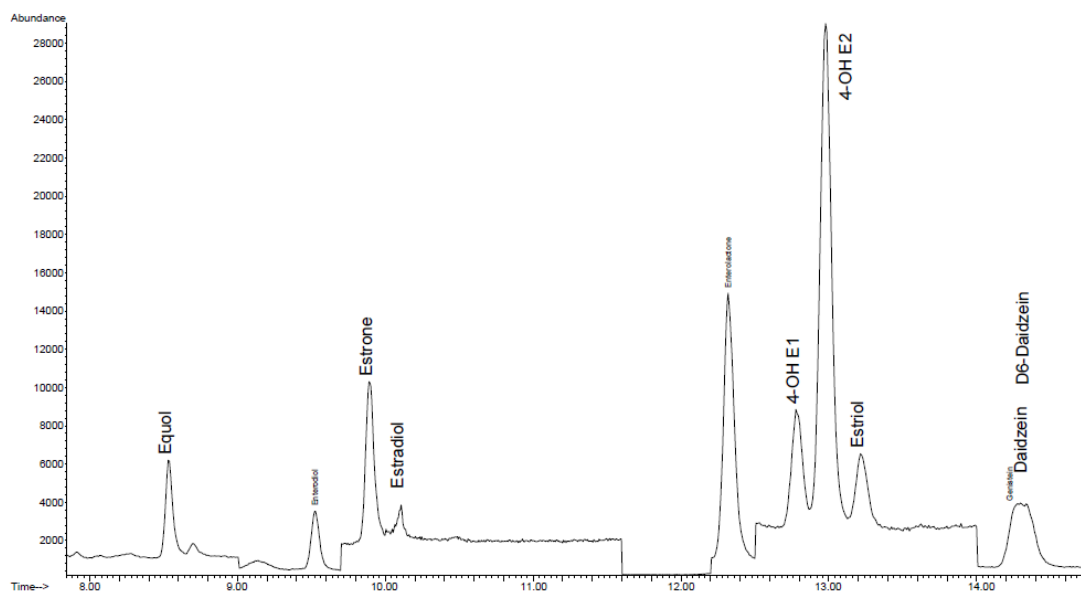

**Fig. S1.** Typical chromatogram of analysis of phytoestrogens and estrogens.
